# Supplementary material
Source: PubMed Central journal article supplement (PMC8665492)

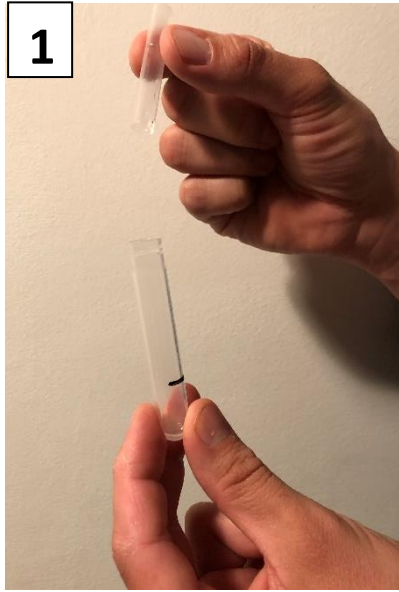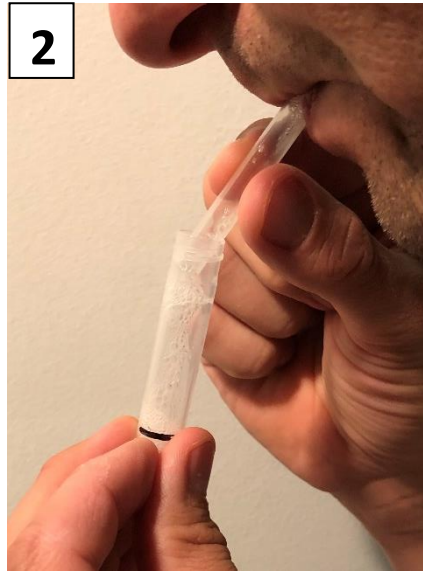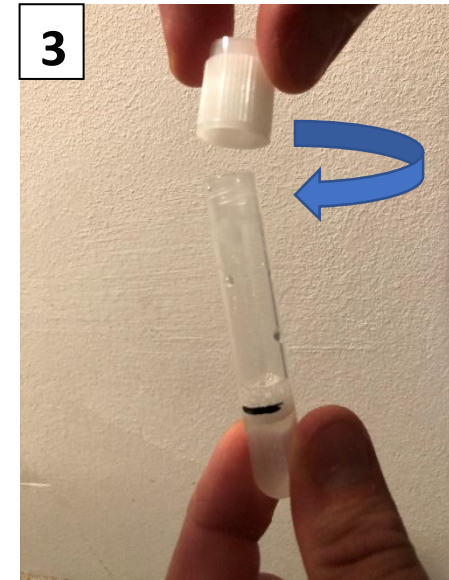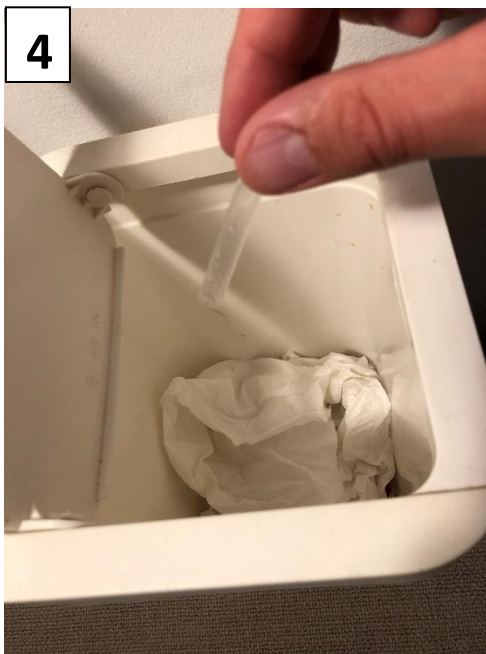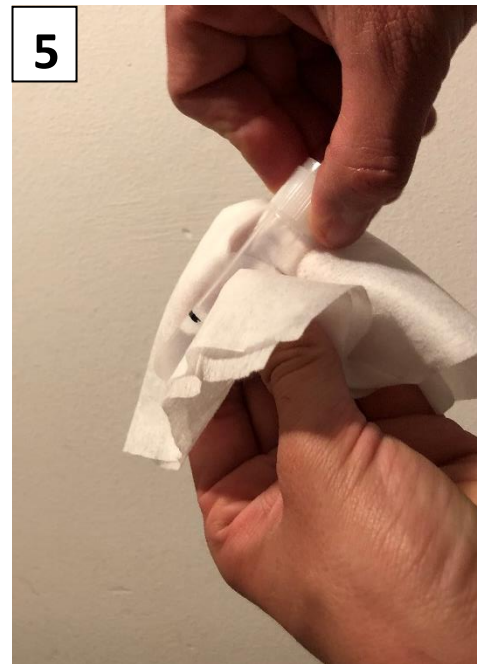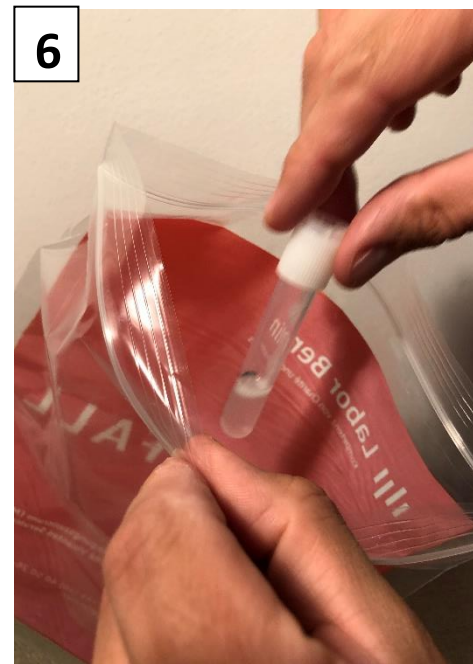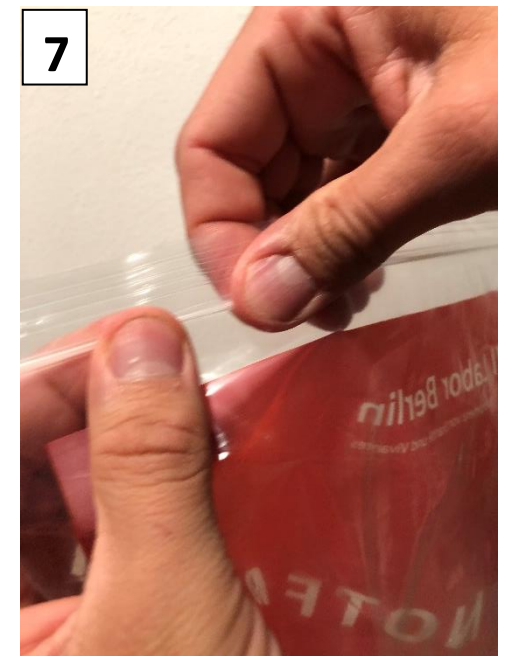

Supplement: 12879_2021_6945_MOESM1_ESM.pdf [file 12879_2021_6945_MOESM1_ESM.pdf]
